# Supplementary material
Source: Springer Nature journal article supplement (https://www.springermedizin.de/resource/supplementary/12885_2014_4557_MOESM2_ESM.pdf/9466626)

■ Responders ■ Non-responders

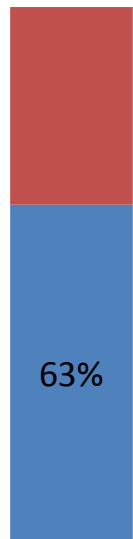

H/H (N=16)

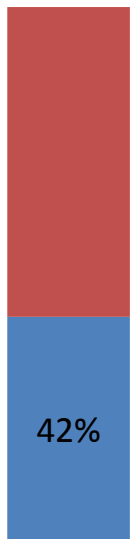

H/R (N= 52)

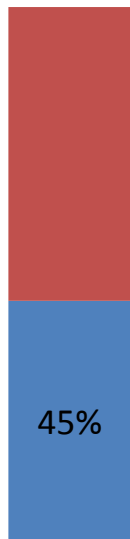

R/R (N = 20)

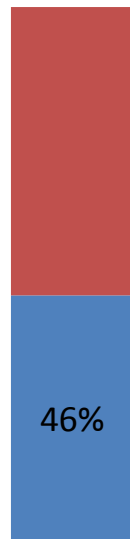

H/H (N = 46)

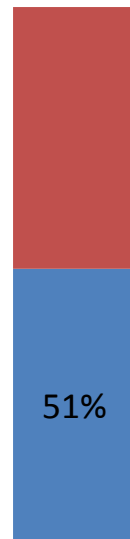

H/R (N = 98)

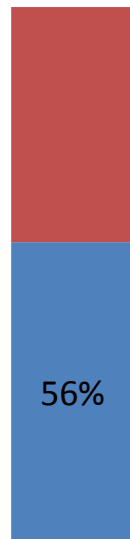

R/R (N = 41)

**FLOX**

**FLOX + cetuximab**

Supplement: MOESM2 [file 9466626]
